# Supplementary material for: Assembloid CRISPR screens reveal impact of disease genes in human neurodevelopment
Source: PubMed Central journal article supplement (PMC10567561; doi:10.1038/s41586-023-06564-w), 2023-09-27

Source Data 1: Full western blots for Fig 3j. Dotted areas indicate example lanes used in the figure.

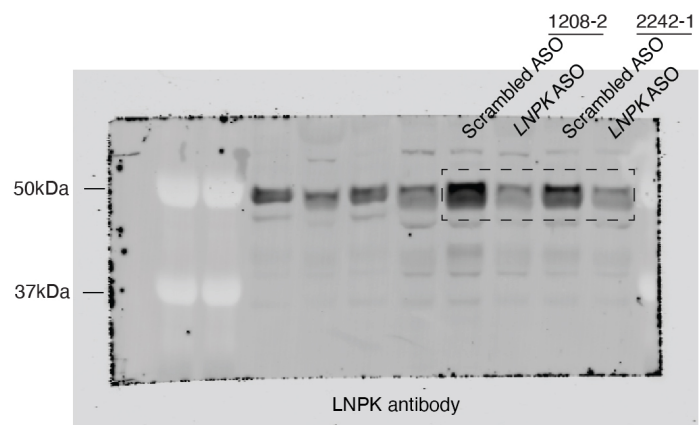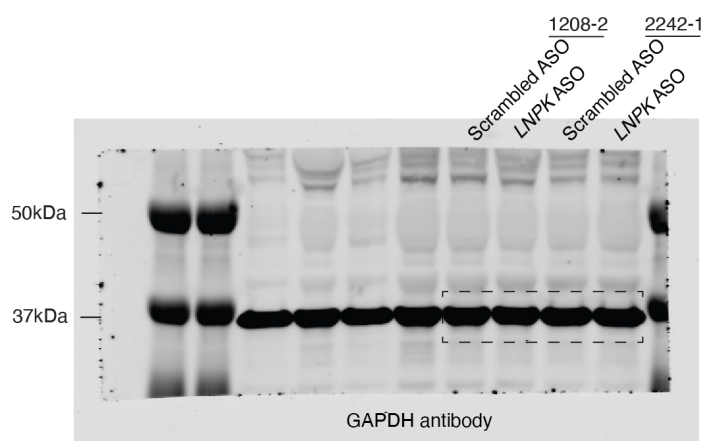

Source Data 2: Full western blots for Extended Data Fig 4. Dotted areas indicate example lanes used in the figure.

Extended data Fig. 4h

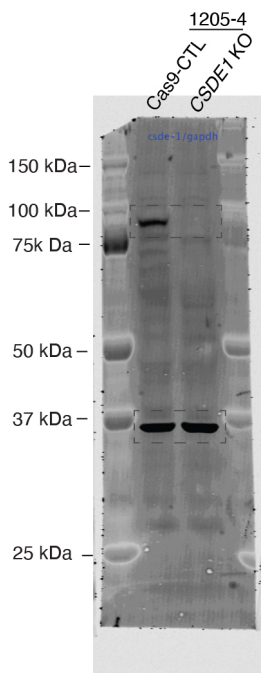

Extended data Fig. 4i

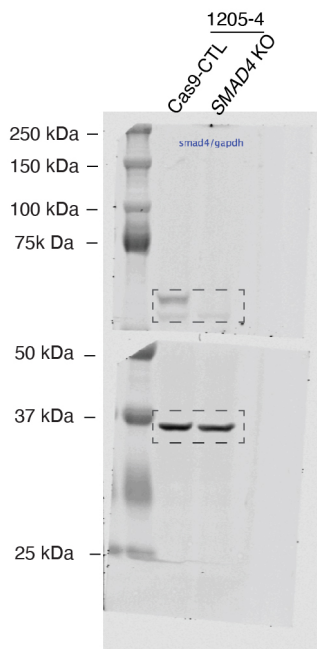

Extended data Fig. 4j

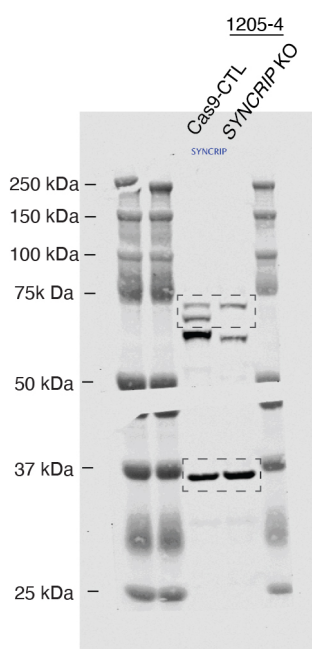

Extended data Fig. 4m

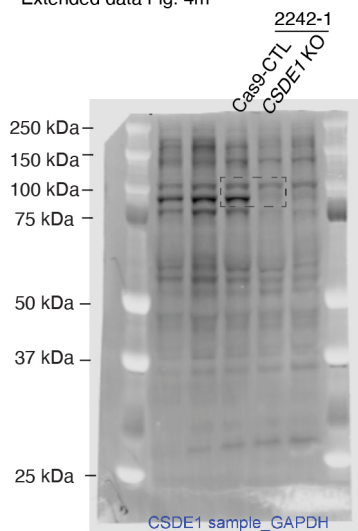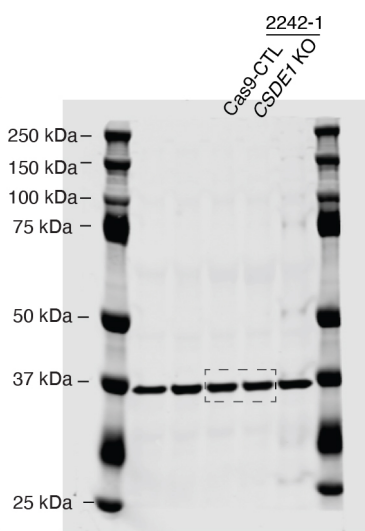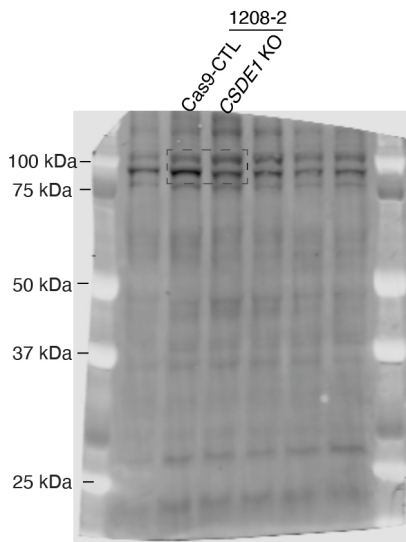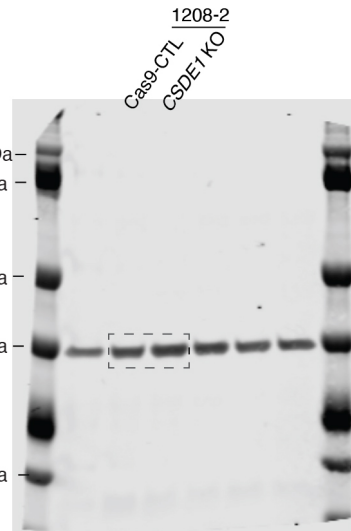

Extended data Fig. 4n

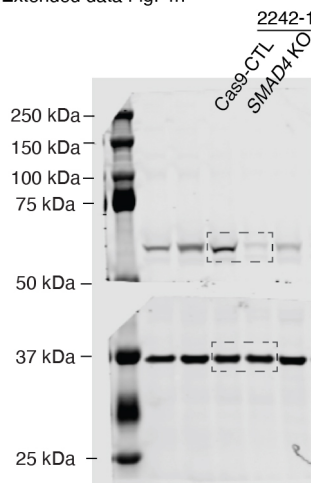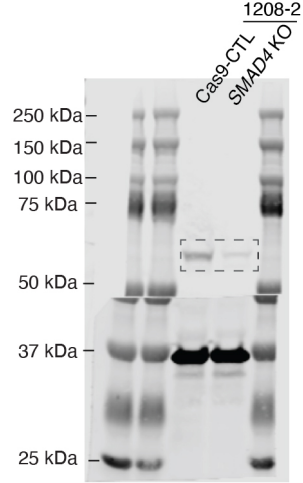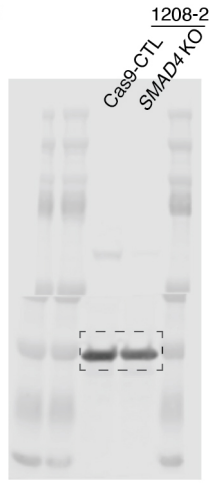

Extended data Fig. 4o

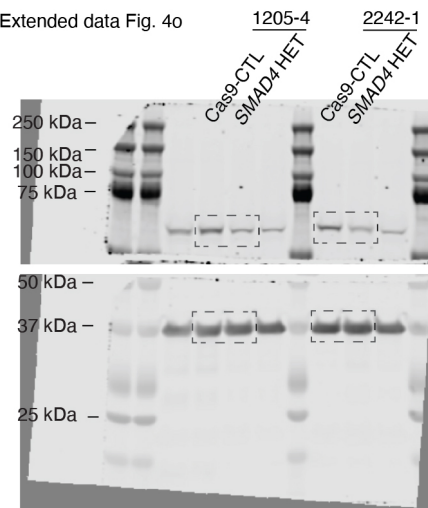

Source Data 3: Full western blots for Extended Data Fig 5f. Dotted areas indicate example lanes used in the figure.

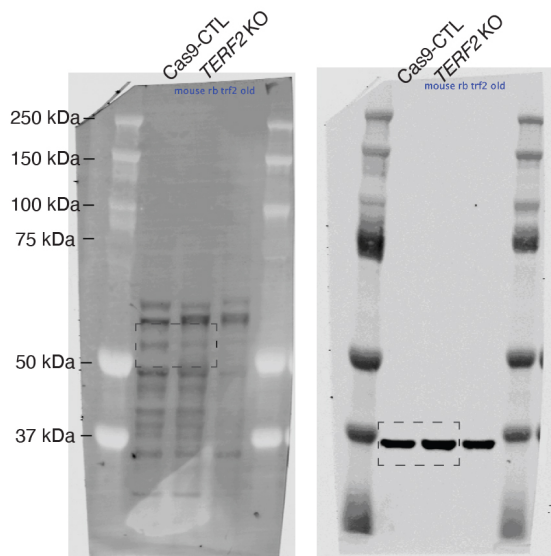

Source Data 4: Full western blots for Extended Data Fig 10j. Dotted areas indicate example lanes used in the figure.

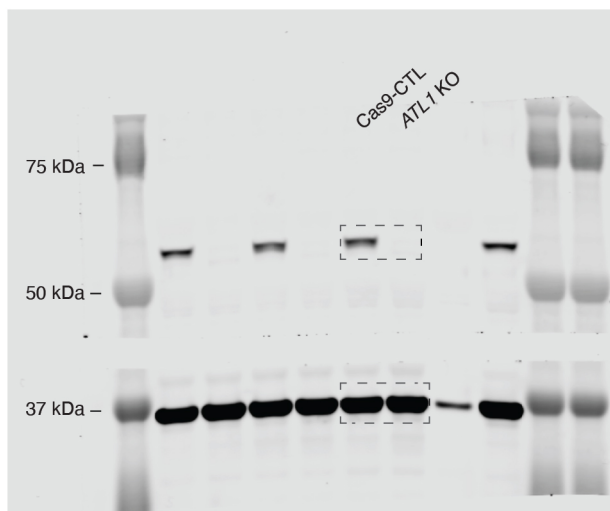

Supplement: 41586_2023_6564_MOESM3_ESM.pdf [file 41586_2023_6564_MOESM3_ESM.pdf]
