# Supplementary material for: Assembloid CRISPR screens reveal impact of disease genes in human neurodevelopment
Source: PubMed Central journal article supplement (PMC10567561; doi:10.1038/s41586-023-06564-w), 2023-09-27
Supplement: 41586_2023_6564_MOESM1_ESM.pdf [file 41586_2023_6564_MOESM1_ESM.pdf]

**Supplementary information**

---

**Assembloid CRISPR screens reveal impact of disease genes in human neurodevelopment**

---

In the format provided by the authors and unedited

**Supplementary Table 1. List of 611 NDDs genes**

|                |                |                |                |
|----------------|----------------|----------------|----------------|
| <i>ARX</i>     | <i>GRIN2B</i>  | <i>RLIM</i>    | <i>SYNGAP1</i> |
| <i>CREBBP</i>  | <i>ICA1</i>    | <i>DHX30</i>   | <i>PHF2</i>    |
| <i>KMT2E</i>   | <i>JARID2</i>  | <i>CDK8</i>    | <i>SHANK3</i>  |
| <i>PPP5C</i>   | <i>CSDE1</i>   | <i>SNX14</i>   | <i>MAGEL2</i>  |
| <i>SPAST</i>   | <i>ZMYND11</i> | <i>AHI1</i>    | <i>PON1</i>    |
| <i>NRXN3</i>   | <i>CUL7</i>    | <i>RAC1</i>    | <i>UBE3C</i>   |
| <i>CUL3</i>    | <i>SPEN</i>    | <i>GABBR2</i>  | <i>NFE2L3</i>  |
| <i>TRIO</i>    | <i>PHRF1</i>   | <i>FBXO11</i>  | <i>DLX3</i>    |
| <i>AP2S1</i>   | <i>P4HA2</i>   | <i>GALNT2</i>  | <i>ASPM</i>    |
| <i>ARID1B</i>  | <i>CLASP1</i>  | <i>LNPBK</i>   | <i>DAPP1</i>   |
| <i>NEXMIF</i>  | <i>KCNQ2</i>   | <i>MED12L</i>  | <i>NUAK1</i>   |
| <i>KMT2C</i>   | <i>CTTNBP2</i> | <i>HDAC8</i>   | <i>GPC4</i>    |
| <i>NCKAP1</i>  | <i>OPHN1</i>   | <i>TAF1</i>    | <i>RBFOX1</i>  |
| <i>RFX3</i>    | <i>KAT6A</i>   | <i>NFIB</i>    | <i>P2RX5</i>   |
| <i>SRCAP</i>   | <i>ACHE</i>    | <i>NTRK2</i>   | <i>LAMB1</i>   |
| <i>NCOA1</i>   | <i>SNX5</i>    | <i>POLR3A</i>  | <i>MYO9B</i>   |
| <i>ATRX</i>    | <i>RBM27</i>   | <i>PAK1</i>    | <i>PRODH</i>   |
| <i>POMGNT1</i> | <i>SUPT16H</i> | <i>CHD1</i>    | <i>INTS6</i>   |
| <i>CNOT3</i>   | <i>AGO1</i>    | <i>XPC</i>     | <i>SLC7A5</i>  |
| <i>DPYSL2</i>  | <i>BTAF1</i>   | <i>SLC45A1</i> | <i>PRKD2</i>   |
| <i>WAC</i>     | <i>SBF1</i>    | <i>WDR26</i>   | <i>GRIK5</i>   |
| <i>LZTR1</i>   | <i>TNRC6B</i>  | <i>ATP1A1</i>  | <i>MET</i>     |
| <i>EP300</i>   | <i>NINL</i>    | <i>RAD21</i>   | <i>CNTNAP3</i> |
| <i>CHD8</i>    | <i>RAB2A</i>   | <i>KIF5C</i>   | <i>DOCK8</i>   |
| <i>ZMYND8</i>  | <i>UBR5</i>    | <i>YWHAG</i>   | <i>KAT2B</i>   |
| <i>ADNP</i>    | <i>ETFB</i>    | <i>PPM1D</i>   | <i>PARD3B</i>  |
| <i>TM9SF4</i>  | <i>TAF6</i>    | <i>GATM</i>    | <i>AMPD1</i>   |
| <i>CELF4</i>   | <i>CEP41</i>   | <i>HCFC1</i>   | <i>KIF14</i>   |
| <i>FMR1</i>    | <i>KDM4C</i>   | <i>RSRC1</i>   | <i>USP45</i>   |
| <i>CORO1A</i>  | <i>ZMIZ1</i>   | <i>PCCA</i>    | <i>PREX1</i>   |
| <i>CTCF</i>    | <i>ELP4</i>    | <i>DOLK</i>    | <i>VIL1</i>    |
| <i>TSC2</i>    | <i>ERBIN</i>   | <i>NR2F1</i>   | <i>WDFY4</i>   |
| <i>BCKDK</i>   | <i>SEMA5A</i>  | <i>RIMS2</i>   | <i>CGNL1</i>   |
| <i>MED13</i>   | <i>CCNG1</i>   | <i>RPS6KA3</i> | <i>GALNT8</i>  |
| <i>RAI1</i>    | <i>CPEB4</i>   | <i>PACS2</i>   | <i>CASZ1</i>   |
| <i>PHF12</i>   | <i>CCT4</i>    | <i>SGSH</i>    | <i>EFR3A</i>   |

|         |             |          |          |
|---------|-------------|----------|----------|
| KMT5B   | SRSF11      | AP1S2    | CNTN6    |
| NRXN2   | APH1A       | TRAPPC6B | TRPM1    |
| ALDH5A1 | CNR1        | PRKD1    | ANXA1    |
| PPP2R5D | SET         | ANKS1B   | AGAP2    |
| NUP155  | SLC35B1     | TET3     | CIB2     |
| TRIM23  | LRP1        | ARID2    | LMX1B    |
| UBE3A   | SLC12A5     | TRRAP    | TRPC6    |
| FOXP1   | RPS10P2-AS1 | CEP290   | ADCY3    |
| HDLBP   | KDM5C       | POU3F3   | HECW2    |
| SON     | HIVEP3      | DMD      | PRICKLE1 |
| ASH1L   | SMARCA4     | VAMP2    | SLC6A3   |
| KDM5B   | AKAP9       | KCNMA1   | KIRREL3  |
| KMT2A   | ZC3H4       | MSL3     | TAOK2    |
| PHF3    | CHMP1A      | PDK2     | CNTN5    |
| IRF2BPL | CC2D1A      | TNPO3    | CNTNAP4  |
| DNMT3A  | PER2        | SMARCD1  | FAM92B   |
| BCL11A  | TERF2       | GNAO1    | GRIP1    |
| KANSL1  | MYH10       | CABP7    | ATP2B2   |
| GRIA2   | UNC79       | CSNK2A1  | SHANK1   |
| KDM3B   | AGO4        | NAA10    | DISC1    |
| MED13L  | CAPRIN1     | MAPK3    | PYHIN1   |
| BAZ2B   | USP15       | RAB11A   | STXBP5   |
| UPF3B   | DENR        | PPP2R1A  | SLITRK5  |
| MBOAT7  | ST8SIA2     | TNPO2    | FBN1     |
| HNRNPH2 | CDH13       | DNM1     | AVPR1A   |
| GNAI1   | NCOR1       | LARP4B   | CHRNA7   |
| EIF3G   | SMAD4       | ENO3     | OTUD7A   |
| ARHGEF9 | SAE1        | EFTUD2   | ZNF804A  |
| TRAF7   | ILF2        | NSD2     | KCNS3    |
| KDM6B   | CNTN4       | CHD4     | PAH      |
| VPS13B  | AMT         | CERT1    | RAB43    |
| MEIS2   | NLGN4X      | HMGXB3   | CEP135   |
| SOX5    | KDM6A       | PAPOLG   | GRIN1    |
| PHF21A  | ASTN2       | SF3B1    | KCNJ10   |
| VEZF1   | CNKSR2      | ODC1     | OXTR     |
| SCN2A   | DLG2        | AGO3     | GABRG3   |
| STXBP1  | DIP2C       | ZC4H2    | GRID1    |
| SMARCC2 | ASAP2       | KIF1A    | GRIN2A   |
| ASXL3   | SPARCL1     | PDHA1    | PRKN     |

|                 |                 |                 |                  |
|-----------------|-----------------|-----------------|------------------|
| <i>RERE</i>     | <i>GRIA1</i>    | <i>RRP8</i>     | <i>SHOX</i>      |
| <i>POGZ</i>     | <i>TBC1D31</i>  | <i>FAM104A</i>  | <i>TMLHE</i>     |
| <i>SCN1A</i>    | <i>CACNA1D</i>  | <i>SYNCRIP</i>  | <i>WWOX</i>      |
| <i>TBCK</i>     | <i>SLC38A10</i> | <i>TRA2B</i>    | <i>CACNA1H</i>   |
| <i>ANK2</i>     | <i>UBN2</i>     | <i>ABI2</i>     | <i>ADA</i>       |
| <i>GABRB2</i>   | <i>EMSY</i>     | <i>HNRNPD</i>   | <i>OR52M1</i>    |
| <i>PHIP</i>     | <i>PRICKLE2</i> | <i>TCF12</i>    | <i>ATP10A</i>    |
| <i>GIGYF1</i>   | <i>PLXNB1</i>   | <i>ANP32A</i>   | <i>PTCHD1-AS</i> |
| <i>TLK2</i>     | <i>GRIK2</i>    | <i>CLTC</i>     | <i>MFRP</i>      |
| <i>CASK</i>     | <i>SLC7A3</i>   | <i>MTF2</i>     | <i>MSNP1AS</i>   |
| <i>ZNF462</i>   | <i>CACNB2</i>   | <i>SUSD4</i>    | <i>ITGB3</i>     |
| <i>LRRC4C</i>   | <i>APBB1</i>    | <i>GATAD2B</i>  | <i>CYFIP1</i>    |
| <i>CACNA1C</i>  | <i>LEO1</i>     | <i>UNC80</i>    | <i>MIR137</i>    |
| <i>ANK3</i>     | <i>PRKCB</i>    | <i>BTF3</i>     | <i>GGNBP2</i>    |
| <i>SETBP1</i>   | <i>NAV2</i>     | <i>NONO</i>     | <i>NFIX</i>      |
| <i>HNRNPU</i>   | <i>PHB</i>      | <i>TMEM178A</i> | <i>CDK13</i>     |
| <i>NR4A2</i>    | <i>TRAPPC9</i>  | <i>PRKCA</i>    | <i>HDAC4</i>     |
| <i>TRIP12</i>   | <i>KIAA1586</i> | <i>KAT6B</i>    | <i>BCORL1</i>    |
| <i>SLC6A1</i>   | <i>TET2</i>     | <i>KCNJ6</i>    | <i>SETD1A</i>    |
| <i>CACNA2D3</i> | <i>SCN9A</i>    | <i>STC1</i>     | <i>DEPDC5</i>    |
| <i>DYRK1A</i>   | <i>NLGN1</i>    | <i>STARD9</i>   | <i>CHKB</i>      |
| <i>BRAF</i>     | <i>CTNND2</i>   | <i>DVL3</i>     | <i>EEF1A2</i>    |
| <i>AUTS2</i>    | <i>RALGAPB</i>  | <i>RPL26</i>    | <i>PIK3R2</i>    |
| <i>UBR1</i>     | <i>DLGAP1</i>   | <i>PRPF18</i>   | <i>HOXA1</i>     |
| <i>DIP2A</i>    | <i>NUDCD2</i>   | <i>SRRM2</i>    | <i>CUX2</i>      |
| <i>TAOK1</i>    | <i>GPHN</i>     | <i>H1-4</i>     | <i>FBRSL1</i>    |
| <i>SHANK2</i>   | <i>MACROD2</i>  | <i>MAP2K1</i>   | <i>KPTN</i>      |
| <i>WDFY3</i>    | <i>CNTNAP2</i>  | <i>TMEM42</i>   | <i>SATB2</i>     |
| <i>NAA15</i>    | <i>DPP10</i>    | <i>KCND3</i>    | <i>ZSWIM6</i>    |
| <i>NIPBL</i>    | <i>PAK2</i>     | <i>ASXL1</i>    | <i>CYP27A1</i>   |
| <i>PTCHD1</i>   | <i>PLCB1</i>    | <i>SNAPC5</i>   | <i>SETD1B</i>    |
| <i>NSD1</i>     | <i>EP400</i>    | <i>PUF60</i>    | <i>CACNA1A</i>   |
| <i>TSC1</i>     | <i>ROBO2</i>    | <i>SKIDA1</i>   | <i>SIK1</i>      |
| <i>GABRB3</i>   | <i>USP7</i>     | <i>PSMG4</i>    | <i>TTN</i>       |
| <i>MAP1A</i>    | <i>MYO5A</i>    | <i>PBX1</i>     | <i>NTNG1</i>     |
| <i>ANKRD11</i>  | <i>QRICH1</i>   | <i>YTHDF3</i>   | <i>HCN1</i>      |
| <i>CTNNB1</i>   | <i>CDC42BPB</i> | <i>SEPTIN10</i> | <i>INTS1</i>     |
| <i>SETD5</i>    | <i>MTOR</i>     | <i>WDR45</i>    | <i>BRWD3</i>     |
| <i>MECP2</i>    | <i>RANBP17</i>  | <i>PPP1CB</i>   | <i>HEPACAM</i>   |

|                 |                 |                |                |
|-----------------|-----------------|----------------|----------------|
| <i>SIN3A</i>    | <i>HMGN1</i>    | <i>FAM200A</i> | <i>TM4SF20</i> |
| <i>NLGN2</i>    | <i>PLXNA4</i>   | <i>FAM200B</i> | <i>FRMPD4</i>  |
| <i>CHD3</i>     | <i>CUX1</i>     | <i>ALG13</i>   | <i>PHF8</i>    |
| <i>KIAA0232</i> | <i>RALA</i>     | <i>SNAP25</i>  | <i>RNF135</i>  |
| <i>TANC2</i>    | <i>PAX6</i>     | <i>SLC35A2</i> | <i>TBX1</i>    |
| <i>CHD7</i>     | <i>GABRA3</i>   | <i>CDKL5</i>   | <i>ALDH1A3</i> |
| <i>PTEN</i>     | <i>TBC1D23</i>  | <i>HIVEP2</i>  | <i>NTNG2</i>   |
| <i>DHCR7</i>    | <i>CAMK2B</i>   | <i>CIC</i>     | <i>DLL1</i>    |
| <i>NBEA</i>     | <i>CTNNA2</i>   | <i>RIMS1</i>   | <i>ACY1</i>    |
| <i>HECTD4</i>   | <i>SYT1</i>     | <i>TCF20</i>   | <i>TAB2</i>    |
| <i>CHD2</i>     | <i>RORA</i>     | <i>DMPK</i>    | <i>U2AF2</i>   |
| <i>HRAS</i>     | <i>CAMK2A</i>   | <i>EBF3</i>    | <i>FOSL2</i>   |
| <i>PACS1</i>    | <i>SMC1A</i>    | <i>PPP1R9B</i> | <i>GLRA2</i>   |
| <i>FOXG1</i>    | <i>CLCN4</i>    | <i>PTK7</i>    | <i>CAPN15</i>  |
| <i>DEAF1</i>    | <i>ACTB</i>     | <i>TEK</i>     | <i>ADAP1</i>   |
| <i>TBL1XR1</i>  | <i>ACTL6B</i>   | <i>TSHZ3</i>   | <i>CBL</i>     |
| <i>PTPN11</i>   | <i>SMARCA2</i>  | <i>IQSEC2</i>  | <i>C2orf42</i> |
| <i>NRXN1</i>    | <i>MEF2C</i>    | <i>PRR12</i>   | <i>PIK3CA</i>  |
| <i>EHMT1</i>    | <i>HUWE1</i>    | <i>AHDC1</i>   | <i>KCNC1</i>   |
| <i>SETD2</i>    | <i>ALG6</i>     | <i>FOXP2</i>   | <i>SPRY2</i>   |
| <i>ZBTB20</i>   | <i>CCNK</i>     | <i>GFAP</i>    | <i>KIF11</i>   |
| <i>SRPRA</i>    | <i>YY1</i>      | <i>DLG4</i>    | <i>KCNH1</i>   |
| <i>MYT1L</i>    | <i>NOVA2</i>    | <i>TBR1</i>    | <i>AQP10</i>   |
| <i>ZNF292</i>   | <i>ATP1A3</i>   | <i>TCF7L2</i>  | <i>ITPR1</i>   |
| <i>NLGN3</i>    | <i>RHEB</i>     | <i>MKX</i>     | <i>BRPF1</i>   |
| <i>ELAVL3</i>   | <i>SMC3</i>     | <i>NR3C2</i>   | <i>MYO1E</i>   |
| <i>TCF4</i>     | <i>SLC1A2</i>   | <i>AFF2</i>    | <i>ACTC1</i>   |
| <i>NF1</i>      | <i>SOX6</i>     | <i>SKI</i>     | <i>WDR87</i>   |
| <i>DYNC1H1</i>  | <i>C12orf57</i> | <i>KCNB1</i>   | <i>PLAC8L1</i> |
| <i>PSMD12</i>   | <i>WASF1</i>    | <i>NACC1</i>   | <i>ZBTB7A</i>  |
| <i>CACNA1E</i>  | <i>PPP2CA</i>   | <i>PCDH19</i>  | <i>ZBTB18</i>  |
| <i>SLC9A6</i>   | <i>PCCB</i>     | <i>KATNAL2</i> | <i>H2AC6</i>   |
| <i>LDB1</i>     | <i>STAG1</i>    | <i>DSCAM</i>   | <i>PURA</i>    |
| <i>CHAMP1</i>   | <i>OCRL</i>     | <i>BRSK2</i>   | <i>PLK5</i>    |
| <i>RORB</i>     | <i>USP9X</i>    | <i>SATB1</i>   | <i>SHISA6</i>  |
| <i>GIGYF2</i>   | <i>HERC2</i>    | <i>KCNQ3</i>   | <i>RFX8</i>    |
| <i>MBD5</i>     | <i>TTI2</i>     | <i>RELN</i>    | <i>RYR2</i>    |
| <i>DDX3X</i>    | <i>UNC13A</i>   | <i>PAX5</i>    | <i>EGLN2</i>   |
| <i>ADSL</i>     | <i>SYNE1</i>    | <i>SCN8A</i>   |                |

**Supplementary Table 2. List of genes included in the screens**

|                |                 |                 |                 |
|----------------|-----------------|-----------------|-----------------|
| <i>ARX</i>     | <i>TSC1</i>     | <i>NCOR1</i>    | <i>POLR3A</i>   |
| <i>CREBBP</i>  | <i>GABRB3</i>   | <i>SMAD4</i>    | <i>PAK1</i>     |
| <i>KMT2E</i>   | <i>MAP1A</i>    | <i>SAE1</i>     | <i>CHD1</i>     |
| <i>PPP5C</i>   | <i>ANKRD11</i>  | <i>ILF2</i>     | <i>XPC</i>      |
| <i>SPAST</i>   | <i>CTNNB1</i>   | <i>CNTN4</i>    | <i>SLC45A1</i>  |
| <i>NRXN3</i>   | <i>SETD5</i>    | <i>AMT</i>      | <i>WDR26</i>    |
| <i>CUL3</i>    | <i>MECP2</i>    | <i>NLGN4X</i>   | <i>ATP1A1</i>   |
| <i>TRIO</i>    | <i>SIN3A</i>    | <i>KDM6A</i>    | <i>RAD21</i>    |
| <i>AP2S1</i>   | <i>NLGN2</i>    | <i>ASTN2</i>    | <i>KIF5C</i>    |
| <i>ARID1B</i>  | <i>CHD3</i>     | <i>CNKSR2</i>   | <i>YWHAG</i>    |
| <i>NEXMIF</i>  | <i>KIAA0232</i> | <i>DLG2</i>     | <i>PPM1D</i>    |
| <i>KMT2C</i>   | <i>TANC2</i>    | <i>DIP2C</i>    | <i>GATM</i>     |
| <i>NCKAP1</i>  | <i>CHD7</i>     | <i>ASAP2</i>    | <i>HCFC1</i>    |
| <i>RFX3</i>    | <i>PTEN</i>     | <i>SPARCL1</i>  | <i>RSRC1</i>    |
| <i>SRCAP</i>   | <i>DHCR7</i>    | <i>GRIA1</i>    | <i>PCCA</i>     |
| <i>NCOA1</i>   | <i>NBEA</i>     | <i>TBC1D31</i>  | <i>DOLK</i>     |
| <i>ATRX</i>    | <i>HECTD4</i>   | <i>CACNA1D</i>  | <i>NR2F1</i>    |
| <i>POMGNT1</i> | <i>CHD2</i>     | <i>SLC38A10</i> | <i>RIMS2</i>    |
| <i>CNOT3</i>   | <i>HRAS</i>     | <i>UBN2</i>     | <i>RPS6KA3</i>  |
| <i>DPYSL2</i>  | <i>PACS1</i>    | <i>EMSY</i>     | <i>PACS2</i>    |
| <i>WAC</i>     | <i>FOXP1</i>    | <i>PRICKLE2</i> | <i>SGSH</i>     |
| <i>LZTR1</i>   | <i>DEAF1</i>    | <i>PLXNB1</i>   | <i>AP1S2</i>    |
| <i>EP300</i>   | <i>TBL1XR1</i>  | <i>GRIK2</i>    | <i>TRAPPC6B</i> |
| <i>CHD8</i>    | <i>PTPN11</i>   | <i>SLC7A3</i>   | <i>PRKD1</i>    |
| <i>ZMYND8</i>  | <i>NRXN1</i>    | <i>CACNB2</i>   | <i>ANKS1B</i>   |
| <i>ADNP</i>    | <i>EHMT1</i>    | <i>APBB1</i>    | <i>TET3</i>     |
| <i>TM9SF4</i>  | <i>SETD2</i>    | <i>LEO1</i>     | <i>ARID2</i>    |
| <i>CELF4</i>   | <i>ZBTB20</i>   | <i>PRKCB</i>    | <i>TRRAP</i>    |
| <i>FMR1</i>    | <i>SRPRA</i>    | <i>NAV2</i>     | <i>CEP290</i>   |
| <i>CORO1A</i>  | <i>MYT1L</i>    | <i>PHB</i>      | <i>POU3F3</i>   |
| <i>CTCF</i>    | <i>ZNF292</i>   | <i>TRAPPC9</i>  | <i>DMD</i>      |
| <i>TSC2</i>    | <i>NLGN3</i>    | <i>KIAA1586</i> | <i>VAMP2</i>    |
| <i>BCKDK</i>   | <i>ELAVL3</i>   | <i>TET2</i>     | <i>KCNMA1</i>   |
| <i>MED13</i>   | <i>TCF4</i>     | <i>SCN9A</i>    | <i>MSL3</i>     |
| <i>RAI1</i>    | <i>NF1</i>      | <i>NLGN1</i>    | <i>PKD2</i>     |
| <i>PHF12</i>   | <i>DYNC1H1</i>  | <i>CTNND2</i>   | <i>TNPO3</i>    |

|                |                |                 |                |
|----------------|----------------|-----------------|----------------|
| <i>KMT5B</i>   | <i>PSMD12</i>  | <i>RALGAPB</i>  | <i>SMARCD1</i> |
| <i>NRXN2</i>   | <i>CACNA1E</i> | <i>DLGAP1</i>   | <i>GNAO1</i>   |
| <i>ALDH5A1</i> | <i>SLC9A6</i>  | <i>NUDCD2</i>   | <i>CABP7</i>   |
| <i>PPP2R5D</i> | <i>LDB1</i>    | <i>GPHN</i>     | <i>CSNK2A1</i> |
| <i>NUP155</i>  | <i>CHAMP1</i>  | <i>MACROD2</i>  | <i>NAA10</i>   |
| <i>TRIM23</i>  | <i>RORB</i>    | <i>CNTNAP2</i>  | <i>MAPK3</i>   |
| <i>UBE3A</i>   | <i>GIGYF2</i>  | <i>DPP10</i>    | <i>RAB11A</i>  |
| <i>FOXP1</i>   | <i>MBD5</i>    | <i>PAK2</i>     | <i>PPP2R1A</i> |
| <i>HDLBP</i>   | <i>DDX3X</i>   | <i>PLCB1</i>    | <i>TNPO2</i>   |
| <i>SON</i>     | <i>ADSL</i>    | <i>EP400</i>    | <i>DNM1</i>    |
| <i>ASH1L</i>   | <i>GRIN2B</i>  | <i>ROBO2</i>    | <i>LARP4B</i>  |
| <i>KDM5B</i>   | <i>ICA1</i>    | <i>USP7</i>     | <i>ENO3</i>    |
| <i>KMT2A</i>   | <i>JARID2</i>  | <i>MYO5A</i>    | <i>EFTUD2</i>  |
| <i>PHF3</i>    | <i>CSDE1</i>   | <i>QRICH1</i>   | <i>NSD2</i>    |
| <i>IRF2BPL</i> | <i>ZMYND11</i> | <i>CDC42BPB</i> | <i>CHD4</i>    |
| <i>DNMT3A</i>  | <i>CUL7</i>    | <i>MTOR</i>     | <i>CERT1</i>   |
| <i>BCL11A</i>  | <i>SPEN</i>    | <i>RANBP17</i>  | <i>HMGXB3</i>  |
| <i>KANSL1</i>  | <i>PHRF1</i>   | <i>HMGN1</i>    | <i>PAPOLG</i>  |
| <i>GRIA2</i>   | <i>P4HA2</i>   | <i>PLXNA4</i>   | <i>SF3B1</i>   |
| <i>KDM3B</i>   | <i>CLASP1</i>  | <i>CUX1</i>     | <i>ODC1</i>    |
| <i>MED13L</i>  | <i>KCNQ2</i>   | <i>RALA</i>     | <i>AGO3</i>    |
| <i>BAZ2B</i>   | <i>CTTNBP2</i> | <i>PAX6</i>     | <i>ZC4H2</i>   |
| <i>UPF3B</i>   | <i>OPHN1</i>   | <i>GABRA3</i>   | <i>KIF1A</i>   |
| <i>MBOAT7</i>  | <i>KAT6A</i>   | <i>TBC1D23</i>  | <i>PDHA1</i>   |
| <i>HNRNPH2</i> | <i>ACHE</i>    | <i>CAMK2B</i>   | <i>RRP8</i>    |
| <i>GNAI1</i>   | <i>SNX5</i>    | <i>CTNNA2</i>   | <i>FAM104A</i> |
| <i>EIF3G</i>   | <i>RBM27</i>   | <i>SYT1</i>     | <i>SYNCRIP</i> |
| <i>ARHGEF9</i> | <i>SUPT16H</i> | <i>RORA</i>     | <i>TRA2B</i>   |
| <i>TRAF7</i>   | <i>AGO1</i>    | <i>CAMK2A</i>   | <i>ABI2</i>    |
| <i>KDM6B</i>   | <i>BTAF1</i>   | <i>SMC1A</i>    | <i>HNRNPD</i>  |
| <i>VPS13B</i>  | <i>SBF1</i>    | <i>CLCN4</i>    | <i>TCF12</i>   |
| <i>MEIS2</i>   | <i>TNRC6B</i>  | <i>ACTB</i>     | <i>ANP32A</i>  |
| <i>SOX5</i>    | <i>NINL</i>    | <i>ACTL6B</i>   | <i>CLTC</i>    |
| <i>PHF21A</i>  | <i>RAB2A</i>   | <i>SMARCA2</i>  | <i>MTF2</i>    |
| <i>VEZF1</i>   | <i>UBR5</i>    | <i>MEF2C</i>    | <i>SUSD4</i>   |
| <i>SCN2A</i>   | <i>ETFB</i>    | <i>HUWE1</i>    | <i>GATAD2B</i> |
| <i>STXBP1</i>  | <i>TAF6</i>    | <i>ALG6</i>     | <i>UNC80</i>   |
| <i>SMARCC2</i> | <i>CEP41</i>   | <i>CCNK</i>     | <i>BTF3</i>    |
| <i>ASXL3</i>   | <i>KDM4C</i>   | <i>YY1</i>      | <i>NONO</i>    |

|                 |                    |                 |                  |
|-----------------|--------------------|-----------------|------------------|
| <i>RERE</i>     | <i>ZMIZ1</i>       | <i>NOVA2</i>    | <i>TMEM178A</i>  |
| <i>POGZ</i>     | <i>ELP4</i>        | <i>ATP1A3</i>   | <i>PRKCA</i>     |
| <i>SCN1A</i>    | <i>ERBIN</i>       | <i>RHEB</i>     | <i>KAT6B</i>     |
| <i>TBCK</i>     | <i>SEMA5A</i>      | <i>SMC3</i>     | <i>KCNJ6</i>     |
| <i>ANK2</i>     | <i>CCNG1</i>       | <i>SLC1A2</i>   | <i>STC1</i>      |
| <i>GABRB2</i>   | <i>CPEB4</i>       | <i>SOX6</i>     | <i>STARD9</i>    |
| <i>PHIP</i>     | <i>CCT4</i>        | <i>C12orf57</i> | <i>DVL3</i>      |
| <i>GIGYF1</i>   | <i>SRSF11</i>      | <i>WASF1</i>    | <i>RPL26</i>     |
| <i>TLK2</i>     | <i>APH1A</i>       | <i>PPP2CA</i>   | <i>PRPF18</i>    |
| <i>CASK</i>     | <i>CNR1</i>        | <i>PCCB</i>     | <i>SRRM2</i>     |
| <i>ZNF462</i>   | <i>SET</i>         | <i>STAG1</i>    | <i>H1-4</i>      |
| <i>LRRC4C</i>   | <i>SLC35B1</i>     | <i>OCRL</i>     | <i>MAP2K1</i>    |
| <i>CACNA1C</i>  | <i>LRP1</i>        | <i>USP9X</i>    | <i>TMEM42</i>    |
| <i>ANK3</i>     | <i>SLC12A5</i>     | <i>HERC2</i>    | <i>KCND3</i>     |
| <i>SETBP1</i>   | <i>RPS10P2-AS1</i> | <i>TTI2</i>     | <i>ASXL1</i>     |
| <i>HNRNPU</i>   | <i>KDM5C</i>       | <i>UNC13A</i>   | <i>SNAPC5</i>    |
| <i>NR4A2</i>    | <i>HIVEP3</i>      | <i>SYNE1</i>    | <i>PUF60</i>     |
| <i>TRIP12</i>   | <i>SMARCA4</i>     | <i>RLIM</i>     | <i>SKIDA1</i>    |
| <i>SLC6A1</i>   | <i>AKAP9</i>       | <i>DHX30</i>    | <i>PSMG4</i>     |
| <i>CACNA2D3</i> | <i>ZC3H4</i>       | <i>CDK8</i>     | <i>PBX1</i>      |
| <i>DYRK1A</i>   | <i>CHMP1A</i>      | <i>SNX14</i>    | <i>ACKR3*</i>    |
| <i>BRAF</i>     | <i>CC2D1A</i>      | <i>AHI1</i>     | <i>AGTPBP1*</i>  |
| <i>AUTS2</i>    | <i>PER2</i>        | <i>RAC1</i>     | <i>CXCR4*</i>    |
| <i>UBR1</i>     | <i>TERF2</i>       | <i>GABBR2</i>   | <i>DLX1*</i>     |
| <i>DIP2A</i>    | <i>MYH10</i>       | <i>FBXO11</i>   | <i>DLX2*</i>     |
| <i>TAOK1</i>    | <i>UNC79</i>       | <i>GALNT2</i>   | <i>ERBB4*</i>    |
| <i>SHANK2</i>   | <i>AGO4</i>        | <i>LNPk</i>     | <i>PAFAH1B1*</i> |
| <i>WDFY3</i>    | <i>CAPRIN1</i>     | <i>MED12L</i>   | <i>ZEB2*</i>     |
| <i>NAA15</i>    | <i>USP15</i>       | <i>HDAC8</i>    | <i>NKX2.1*</i>   |
| <i>NIPBL</i>    | <i>DENR</i>        | <i>TAF1</i>     | <i>LHX6*</i>     |
| <i>PTCHD1</i>   | <i>ST8SIA2</i>     | <i>NFIB</i>     | <i>SOX2*</i>     |
| <i>NSD1</i>     | <i>CDH13</i>       | <i>NTRK2</i>    | <i>PAX6*</i>     |
| <i>SNAP25</i>   | <i>FAM200B</i>     | <i>PPP1CB</i>   | <i>SOX6*</i>     |
| <i>SLC35A2</i>  | <i>ALG13</i>       | <i>FAM200A</i>  |                  |
| <i>YTHDF3</i>   | <i>SEPTIN10</i>    | <i>WDR45</i>    |                  |

\*Indicate non-NDD genes that have known function in interneuron development



**Supplementary Table 3. Candidate genes of the interneuron generation screen**

| Symbol         | casTLE Effect | casTLE Score | Effect size of individual sgRNA |        |         |        |         |
|----------------|---------------|--------------|---------------------------------|--------|---------|--------|---------|
| <i>SMAD4</i>   | -2.8          | 16.7         | -3.25                           | -2.94  | -2.39   | -1.53  | -0.0459 |
| <i>CSDE1</i>   | -2.7          | 15.9         | -3.02                           | -2.83  | -2.82   | -1.62  | -0.109  |
| <i>NAA10</i>   | 1.9           | 9.85         | -0.762                          | -0.379 | 1.16    | 2.3    | 2.32    |
| <i>TTI2</i>    | 1.4           | 7.8          | -1.34                           | -0.521 | -0.0102 | 1.82   | 1.87    |
| <i>PPM1D</i>   | 1.8           | 7.26         | 0.223                           | 0.588  | 0.734   | 1.69   | 2.27    |
| <i>SYNCRIP</i> | -2.6          | 6.74         | -3.12                           | -1.94  | -1.1    | -0.761 | 0.712   |
| <i>NSD1</i>    | -1.8          | 6.52         | -2.45                           | -1.78  | -1.77   | -0.194 | 1.03    |
| <i>FOXP1</i>   | -1.8          | 6.19         | -2.23                           | -2.12  | -1.55   | 0.575  | 1.29    |
| <i>ACTB</i>    | -2.1          | 5.02         | -2.53                           | -2.16  | -0.667  | 0.533  | 1.05    |
| <i>SRSF11</i>  | -1.5          | 4.85         | -2.03                           | -1.67  | -1.53   | 0.473  | 0.908   |
| <i>POU3F3</i>  | -1.8          | 4.07         | -2.35                           | -1.76  | -0.888  | 0.419  | 0.442   |
| <i>PPP2R1A</i> | -1.6          | 2.98         | -2.08                           | -1.8   | -0.686  | 0.192  | 0.408   |
| <i>RHEB</i>    | -1.4          | 2.42         | -1.93                           | -1.7   | -0.43   | 0.688  | 1.03    |

**Supplementary Table 4. Candidate genes of the Interneuron migration screen**

| Symbol          | casTLE Effect | casTLE Score | Effect size of individual sgRNA |         |        |         |         |
|-----------------|---------------|--------------|---------------------------------|---------|--------|---------|---------|
| <i>EFTUD2</i>   | -4.8          | 7.67         | -5.2                            | -3.24   | -1.83  | -1.34   | -0.0172 |
| <i>STARD9</i>   | -4.5          | 5.2          | -4.9                            | -2.52   | -1.95  | -0.55   | 1.36    |
| <i>NR4A2</i>    | -4.4          | 4.94         | -4.83                           | -2.81   | -1.81  | -0.87   | 0.191   |
| <i>PRKD1</i>    | -4.4          | 4.27         | -4.75                           | -3.76   | -1.16  | -1.12   | 0.773   |
| <i>CHD4</i>     | -4.3          | 8.94         | -4.58                           | -4.32   | -2.85  | -2.33   | -1.22   |
| <i>LNPK</i>     | -4            | 4.92         | -4.56                           | -2.72   | -2.45  | -1.22   | 0.742   |
| <i>COL4A3BP</i> | -3.9          | 1.75         | -4.32                           | -3.07   | -0.692 | 0.791   | 1.46    |
| <i>SRRM2</i>    | -3.8          | 1.46         | -4.18                           | -3.14   | -0.635 | 0.994   | 2.45    |
| <i>HRAS</i>     | -3.8          | 1.3          | -4.18                           | -3.07   | -0.264 | 0.372   | 0.97    |
| <i>DPYSL2</i>   | -3.7          | 1.77         | -3.87                           | -3.85   | -1.21  | 0.821   | 0.91    |
| <i>CAMK2B</i>   | -3.7          | 1.57         | -3.83                           | -3.81   | -0.89  | -0.436  | 0.0177  |
| <i>NCOA1</i>    | -3.6          | 3.47         | -4.17                           | -3.47   | -3.24  | 0.451   | 0.873   |
| <i>GABRA3</i>   | -3.6          | 1            | -3.8                            | -3.67   | 0.422  | 1.3     | 1.46    |
| <i>AMT</i>      | -3.5          | 3.05         | -4.07                           | -3.43   | -2.3   | 0.167   | 1.08    |
| <i>HCFC1</i>    | -3.5          | 1.25         | -3.97                           | -3.17   | -0.552 | -0.337  | 0.129   |
| <i>GIGYF1</i>   | -3.5          | 1.18         | -3.97                           | -3      | -0.452 | -0.244  | 0.92    |
| <i>NLGN1</i>    | -3.5          | 0.99         | -3.87                           | -3.52   | 0.177  | 0.756   | 1.39    |
| <i>RAC1</i>     | -3.3          | 1.89         | -3.69                           | -3.33   | -1.57  | -0.0948 | 0.792   |
| <i>SUPT16H</i>  | -3.3          | 1.57         | -3.87                           | -3.23   | -1.23  | 0.282   | 1.16    |
| <i>ALG6</i>     | -3.2          | 2.17         | -3.89                           | -3.15   | -1.76  | 0.0329  | 0.516   |
| <i>USP7</i>     | -3.1          | 4.61         | -3.35                           | -3.29   | -2.18  | -2.02   | 1.35    |
| <i>TERF2</i>    | -3.1          | 2.29         | -3.86                           | -2.97   | -1.83  | -0.171  | 0.847   |
| <i>PHB</i>      | -3            | 1.89         | -3.66                           | -3.01   | -1.55  | 1.67    | 1.81    |
| <i>NCKAP1</i>   | -2.9          | 4.04         | -3.48                           | -2.95   | -2.45  | -1.38   | 1.78    |
| <i>SEMA5A</i>   | -2.9          | 2.55         | -3.6                            | -2.89   | -2.02  | 0.233   | 1.51    |
| <i>TLK2</i>     | -2.8          | 3.59         | -3.18                           | -2.98   | -2.47  | -0.694  | 0.324   |
| <i>KIF5C</i>    | -2.7          | 1.18         | -3.14                           | -2.77   | 0.37   | 0.5     | 1.04    |
| <i>CHD8</i>     | -2.6          | 3.17         | -3.24                           | -2.66   | -2.23  | -0.364  | 0.175   |
| <i>ILF2</i>     | -2.5          | 2.6          | -3.03                           | -2.53   | -1.38  | -0.964  | -0.12   |
| <i>ERBB2IP</i>  | -2.5          | 1.66         | -2.91                           | -2.6    | -0.653 | -0.316  | 0.454   |
| <i>TRIM23</i>   | 2.5           | 6.19         | -0.998                          | -0.973  | 0.201  | 2.97    | 3.06    |
| <i>TCF4</i>     | 3.1           | 14.6         | -1.05                           | 0.705   | 2.66   | 3.55    | 3.65    |
| <i>RAI1</i>     | 4.7           | 6.05         | -0.953                          | -0.0709 | 0.224  | 2.86    | 5.3     |

**Supplementary Table 5. P values and sample size for Fig. 2f and h**

| Figures | Comparisons       | Days | Genes  | P value (f) /adjusted P value (h) | Cas9-CTL sample size | KO sample size |
|---------|-------------------|------|--------|-----------------------------------|----------------------|----------------|
| Fig.2f  | CSDE1 vs Cas9-CTL | 8    | na     | 0.1647                            | 25                   | 18             |
|         | CSDE1 vs Cas9-CTL | 10   | na     | 0.9191                            | 20                   | 30             |
|         | CSDE1 vs Cas9-CTL | 12   | na     | 0.0559                            | 10                   | 15             |
|         | CSDE1 vs Cas9-CTL | 25   | na     | <0.0001                           | 24                   | 26             |
|         | CSDE1 vs Cas9-CTL | 35   | na     | 0.0001                            | 16                   | 16             |
|         | CSDE1 vs Cas9-CTL | 40   | na     | 0.0002                            | 15                   | 15             |
|         | SMAD4 vs Cas9-CTL | 8    | na     | 0.0007                            | 25                   | 29             |
|         | SMAD4 vs Cas9-CTL | 10   | na     | 0.0002                            | 20                   | 25             |
|         | SMAD4 vs Cas9-CTL | 12   | na     | 0.0115                            | 10                   | 15             |
|         | SMAD4 vs Cas9-CTL | 25   | na     | <0.0001                           | 24                   | 23             |
|         | SMAD4 vs Cas9-CTL | 35   | na     | 0.0002                            | 16                   | 15             |
|         | SMAD4 vs Cas9-CTL | 40   | na     | <0.0001                           | 15                   | 16             |
| Fig.2h  | CSDE1 vs Cas9-CTL | na   | DLX2   | 0.00003462                        | 13                   | 12             |
|         | CSDE1 vs Cas9-CTL | na   | LHX6   | 4.6152E-06                        | 13                   | 12             |
|         | CSDE1 vs Cas9-CTL | na   | NKX2.1 | 0.000006921                       | 13                   | 12             |
|         | CSDE1 vs Cas9-CTL | na   | SOX6   | 0.001285714                       | 13                   | 12             |
|         | CSDE1 vs Cas9-CTL | na   | LHX8   | 6.9228E-06                        | 13                   | 12             |
|         | CSDE1 vs Cas9-CTL | na   | NR2F2  | 0.000666675                       | 13                   | 12             |
|         | CSDE1 vs Cas9-CTL | na   | DBX1   | 0.0018                            | 13                   | 12             |
|         | CSDE1 vs Cas9-CTL | na   | PROX1  | 0.010164706                       | 13                   | 12             |
|         | CSDE1 vs Cas9-CTL | na   | NR2F1  | 0.0006                            | 13                   | 12             |
|         | SMAD4 vs Cas9-CTL | na   | DLX2   | 0.000830769                       | 13                   | 13             |

|                   |    |        |             |    |    |
|-------------------|----|--------|-------------|----|----|
| SMAD4 vs Cas9-CTL | na | LHX6   | 0.000654545 | 13 | 13 |
| SMAD4 vs Cas9-CTL | na | NKX2.1 | 0.00144     | 13 | 13 |
| SMAD4 vs Cas9-CTL | na | SOX6   | 0.00072     | 13 | 13 |
| SMAD4 vs Cas9-CTL | na | LHX8   | 6.87343E-05 | 13 | 13 |
| SMAD4 vs Cas9-CTL | na | NR2F2  | 0.00075     | 13 | 13 |
| SMAD4 vs Cas9-CTL | na | DBX1   | 0.1129      | 13 | 13 |
| SMAD4 vs Cas9-CTL | na | PROX1  | 3.11508E-05 | 13 | 13 |
| SMAD4 vs Cas9-CTL | na | NR2F1  | 6.9228E-06  | 13 | 13 |

**Supplementary Table 6. sgRNA sequences used in this study**

| Experiment                            | Gene             | sgRNA                                                            |
|---------------------------------------|------------------|------------------------------------------------------------------|
| Generate KO cell pool                 | <i>SMAD4</i>     | AU AACAGCUAU AACUACAAA,AAAAAGAGCAAUUGAAAGUU,ACUAUGCACAAUGCUCAGAC |
|                                       | <i>TERF2</i>     | GCUGUUUCUAUCAUGGCCGC,CUGGGUCACGCACGACGCC,GC GCGCCCUCCCCGCCCUCC   |
|                                       | <i>CSDE1</i>     | ACUUUGAUGCGUCCUGGCAA,AGACAAAGAUACGAAAUCCA,CUCGCUCUAAUUUGUCACGU   |
|                                       | <i>SYNCRIP</i>   | UUUACCUCAGUGCCAACAGA,UUUACCUCAGUGCCAACAGA,UUUAAUUUACAGAUUUUGU    |
|                                       | <i>LNPk</i>      | UCAAGCAUUGGAAGAAUUUA,UGUAAACAGAUAGAGAACUG,AGCAAAAAAUGGGAGUGUCA   |
|                                       | <i>ATL1</i>      | CUGUUCAACAGGUGGAUUUU,GAGGAGCCAGUGAAA AAGGC,UGCAGUUUCAUCU AACUCA  |
| Examine heterozygous/homozygous state | <i>SMAD4 #1</i>  | GAUGUGCCAUAGACAAGG                                               |
|                                       | <i>SMAD4 #2</i>  | GUAUGGUAACACAUUUACU                                              |
|                                       | <i>MED13L #1</i> | GUA AUGUAUGCACAAGUG                                              |
|                                       | <i>MED13L #2</i> | GCUAACCUGCUUUGUGUA                                               |
|                                       | <i>BCKDK #1</i>  | GUGCUGAGGAGCGGUCCCCGG                                            |
|                                       | <i>BCKDK #2</i>  | GCGAGUGCGGGUCCCAGGA                                              |
|                                       | <i>CSDE1 #1</i>  | GAAACAAGCCCGCUGUCA                                               |
|                                       | <i>CSDE1 #2</i>  | GUCGAAGGGAACGUUCAGC                                              |
| Mouse slice electroporation           | <i>Lnpk</i>      | AAAAAUAAUACUUACAUCAA,AGUCUUGCUGUAAACUCAUC,AGAUUGCAAAAAUU AUGGGU  |

**Supplementary Table 7. Primers used to amplify genomic DNA for NGS**

| Primer name             | Sequence                                                     |
|-------------------------|--------------------------------------------------------------|
| <i>LNP</i> K-Forward    | ACACTCTTTCCCTACACGACGCTCTTCCGATCTTTTTCTTAAATATCTTTCCTGCTAAAA |
| <i>TERF2</i> -Forward   | ACACTCTTTCCCTACACGACGCTCTTCCGATCTGGAACCTACGGCGTCTGAGAA       |
| <i>CSDE1</i> -Forward   | ACACTCTTTCCCTACACGACGCTCTTCCGATCTTGAGAAATCTCCAGCTAAAATCG     |
| <i>SYNCRIP</i> -Forward | ACACTCTTTCCCTACACGACGCTCTTCCGATCTCCACCTCCAGATTCCGTTTA        |
| <i>SMAD4</i> -Forward   | ACACTCTTTCCCTACACGACGCTCTTCCGATCTTTTCCTTGCAACGTTAGCTG        |
| <i>LNP</i> K-Reverse    | GACTGGAGTTCAGACGTGTGCTCTTCCGATCTTCAGAAAAGGAAAAGATCAACAA      |
| <i>TERF2</i> -Reverse   | GACTGGAGTTCAGACGTGTGCTCTTCCGATCTCGCCTCGTGGAAGTAGAACT         |
| <i>CSDE1</i> -Reverse   | GACTGGAGTTCAGACGTGTGCTCTTCCGATCTAACATTGGCTTTTCGCAATATT       |
| <i>SYNCRIP</i> -Reverse | GACTGGAGTTCAGACGTGTGCTCTTCCGATCTAGCCTCCTGAGCTGCTTTCTT        |
| <i>SMAD4</i> -Reverse   | GACTGGAGTTCAGACGTGTGCTCTTCCGATCTAGCCTCCCATCCAATGTTCT         |

**Supplementary Table 8. Primers for RT-qPCR**

| Gene          | Forward primer                                        | Reverse primer           |
|---------------|-------------------------------------------------------|--------------------------|
| GAPDH         | CATGAGAAGTATGACAACAGCCT                               | AGTCCTTCCACGATACCAAAGT   |
| <i>PROX1</i>  | CTGAAGACCTACTTCTCCGACG                                | GATGGCTTGACGTGCGTACTTC   |
| <i>NR2F2</i>  | TGCACGTTGACTCAGCCGAGTA                                | AAGCACACTGAGACTTTTCCTGC  |
| SOX6          | GCCTAAGTGACCGTTTTGGCAG                                | GGCATCTTTGCTCCAGGTGACA   |
| <i>DBX1</i>   | GTTTGGAGTGAACGCCATCCTC                                | CGAAGTAGGGAAAGGCCGAAGGT  |
| <i>DLX2</i>   | ACGGGAAGCCAAAGAAAGTC                                  | TTTTGGAAACGCCGCTGAAG     |
| <i>NKX2.1</i> | ACCACAAAGGCCAAACTGCTG                                 | TGAGATTGGATGCGCTTGTTG    |
| <i>LHX8</i>   | TGCTTTGCCTGCTTTTCCTG                                  | TGCAGAGGACTTTCTCTTCCAC   |
| <i>LHX6</i>   | TGAATTGTGCGATGCCAACG                                  | TAACATTGGGGGTTGTCAGC     |
| <i>NR2F1</i>  | TGCCTCAAAGCCATCGTGCTGT                                | CAGCAGCAGTTTGCCAAAACGG   |
| <i>LNPk</i>   | CAGAAAGGACTGTTACTCCAGCC                               | GCTAAAGGTGGACCTGGAGGAT   |
| <i>LnPk</i>   | CGCCAGAAAGAACTGTTGCTCC                                | TATCCAGAGCACCTCGTTCTCG   |
| <i>Gapdh</i>  | CATCACTGCCACCCAGAAGACTG                               | ATGCCAGTGAGCTTCCC GTTCAG |
| <i>Cas9</i>   | Primers were ordered from System Bioscience Cas9-PR-1 |                          |

**Supplementary Table 9. PCR primers used in this study**

| Experiment                            | Gene                    | Forward primer              | Reverse primer                 |
|---------------------------------------|-------------------------|-----------------------------|--------------------------------|
| Generate KO cell pool                 | <i>LNPk</i>             | TTCCCTGAATCTTTGC<br>CAAT    | TGGATTACAAATGAAGGT<br>TTAGAACA |
|                                       | <i>TERF2</i>            | CGCGTCCCTAGCATA<br>GTAGC    | TCCCGGATCTGTCTGAAG<br>TC       |
|                                       | <i>CSDE1</i>            | TGGTTGACTCGTGTG<br>ACCAT    | CCTGTCCAGATTTCCATT<br>CAA      |
|                                       | <i>SYNCRIP</i>          | TGAACAGGACCCTGG<br>ACTTC    | CGTGAAAACCTGAAGGGG<br>AAA      |
|                                       | <i>SMAD4</i>            | CCAGAGCAATTTTCATC<br>TTTTCC | CGAAGTGTGGGTTTTCTG<br>CT       |
|                                       | <i>ATL1</i>             | TCCTCCTGGGATATA<br>GTGTGAA  | TGAAGTGACAGAAGCACA<br>GAAGA    |
| Examine heterozygous/homozygous state | <i>SMAD4 #1 and #2*</i> | CCAGAGCAATTTTCATC<br>TTTTCC | CGAAGTGTGGGTTTTCTG<br>CT       |
|                                       | <i>MED13L #1</i>        | TCTTGTGCTAGACACT<br>GAGAC   | TTACTGGGCAAGATGGTT<br>ATCC     |
|                                       | <i>MED13L #2</i>        | ACATACATTCTTCACT<br>GGGAGG  | CAGTGGATCTTAGCCTGG<br>TTTC     |
|                                       | <i>BCKDK #1 and #2</i>  | TGCGGGTTCTGTGGA<br>TTC      | CAAGCAATCGTCTGCCAC<br>TCTG     |
|                                       | <i>CSDE1 #1</i>         | ACAGTCCCAGAGAAA<br>GATGACC  | AAAGCCAAATGCCTCCTG<br>AAGC     |
|                                       | <i>CSDE1 #2</i>         | GTCTCTGGGCAAATG<br>CTTCCAC  | TCTTCCTCTGAGACCCTG<br>CATC     |

\*Same as the primers used in generating KO pool



**Supplementary Table 10. Coordinates of CNVs in SNP array**

| hiPS cell lines | Length (Mb) | CN          | Chr:start-stop (hg19)    |
|-----------------|-------------|-------------|--------------------------|
| 1205-4          | NA          | NA          | NA                       |
| 1208-2          | 0.369509    | duplication | chr2:113067622-113437130 |
|                 | 0.116394    | deletion    | chr8:105069228-105185621 |
|                 | 0.476852    | duplication | chr19:27738372-28215223  |
|                 | 0.754378    | deletion    | chr1:25413466-26167843   |
| 2242-1          | 0.191237    | deletion    | chr21:14766737-14957973  |
|                 | 0.367091    | duplication | chr8:31950827-32317917   |
| SEC61B-mEGFP    | 0.112539    | duplication | chr5:351615-464153       |
|                 | 0.875943    | deletion    | chr7:69282553-70158495   |

## Supplementary Fig. 1

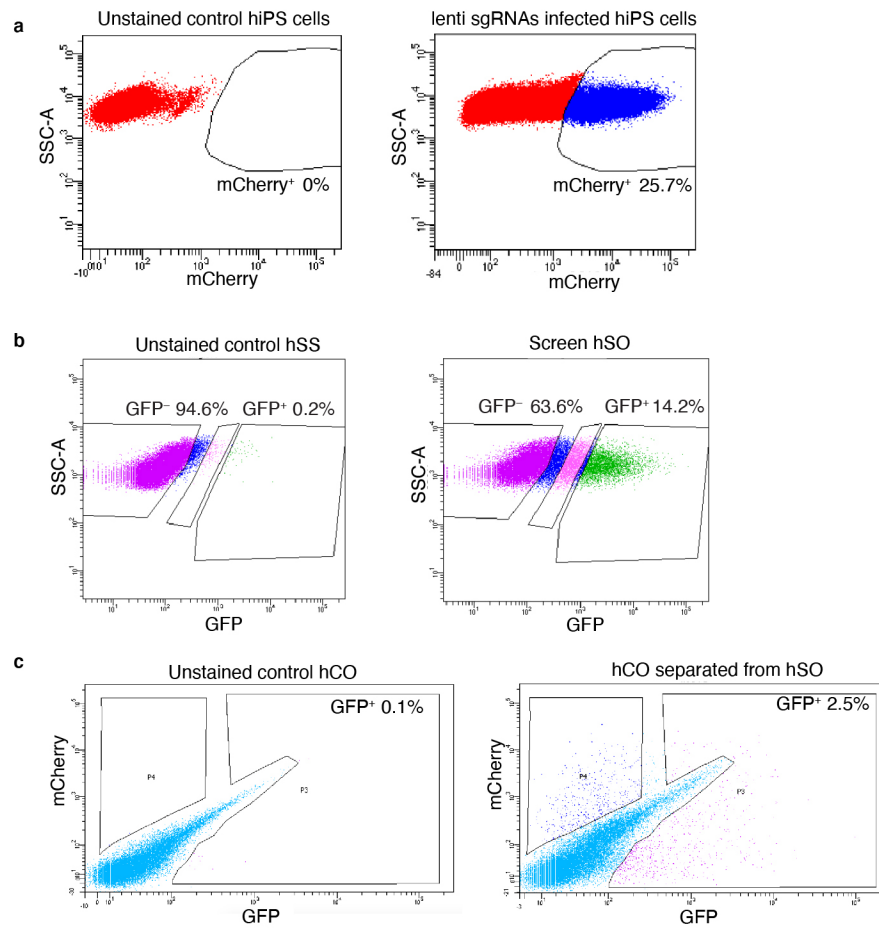

Supplementary Fig. 1. FACS gating strategies. **a-c**. Representative FACS gating strategies to sort lentivirus encoding sgRNAs library-infected cells (mCherry<sup>+</sup>, **a**), eGFP<sup>+</sup> and eGFP<sup>-</sup> cells from hSO (**b**), and eGFP<sup>+</sup> cells from hCO (**c**) as illustrated in Fig 1b. Control hiPS cells, control hSO, and control hCO were used as negative controls.
